# Supplementary material for: Strong metal–support interactions between atomically dispersed Ru and CrOx for improved durability of chlorobenzene oxidation
Source: Royal Society of Chemistry journal article supplement (doi:10.1039/d2ra07650k), 2023-01-01
Supplement: d2ra07650k1.pdf [file d2ra07650k1.pdf]

## Supporting Information

### Strong metal-support interactions between atomically dispersed Ru and $\text{CrO}_x$ for improved durability of chlorobenzene oxidation

Xi Chen,<sup>a</sup> Ziliang Jia,<sup>a</sup> Zhihong Liu,<sup>a</sup> Xiaoyan Wang,<sup>a</sup> and Meisheng Liang<sup>\*a</sup>

<sup>a</sup> College of Environmental Science and Engineering, Taiyuan University of Technology, Jinzhong 030600, China

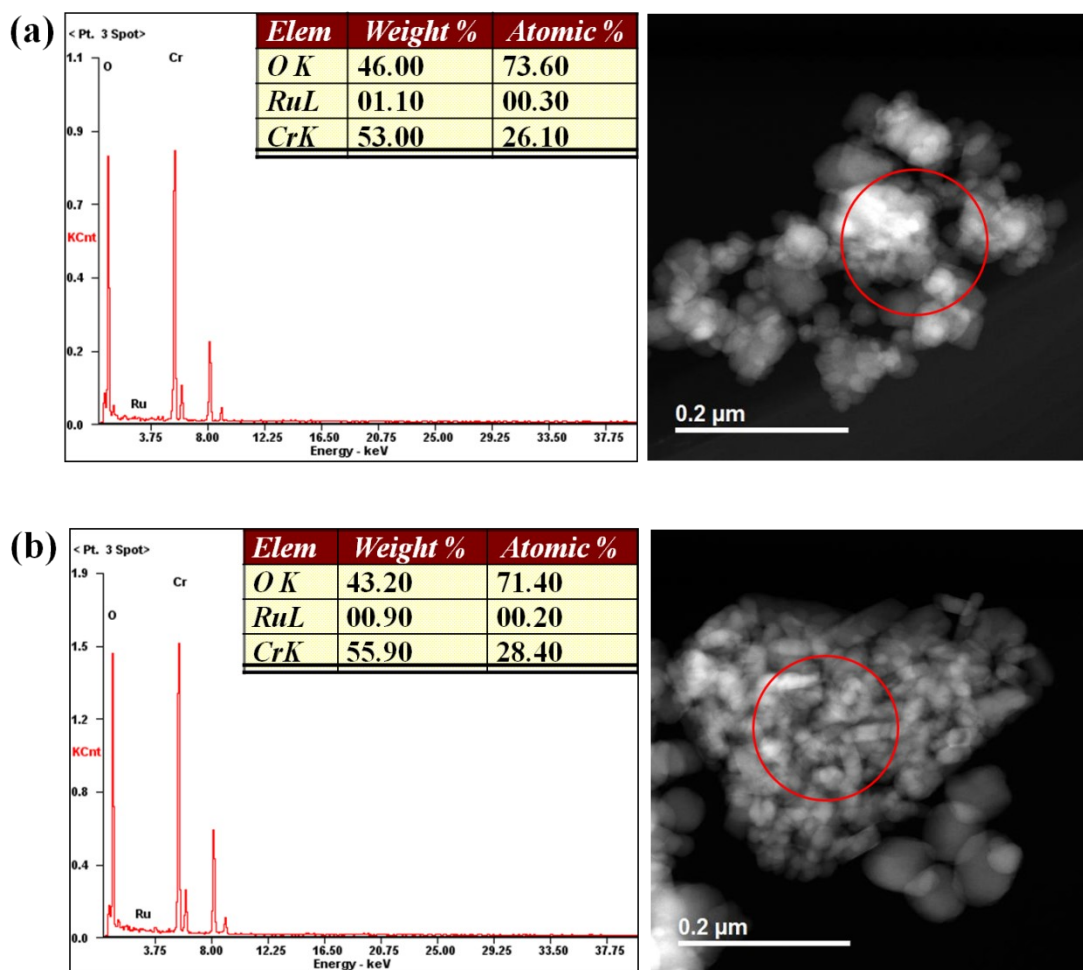

Fig. S1 EDS analysis of catalysts: (a)  $1\text{RuCr}_2\text{O}_3\text{-P}$ , (b)  $1\text{RuCr}_2\text{O}_3\text{-M}$ .

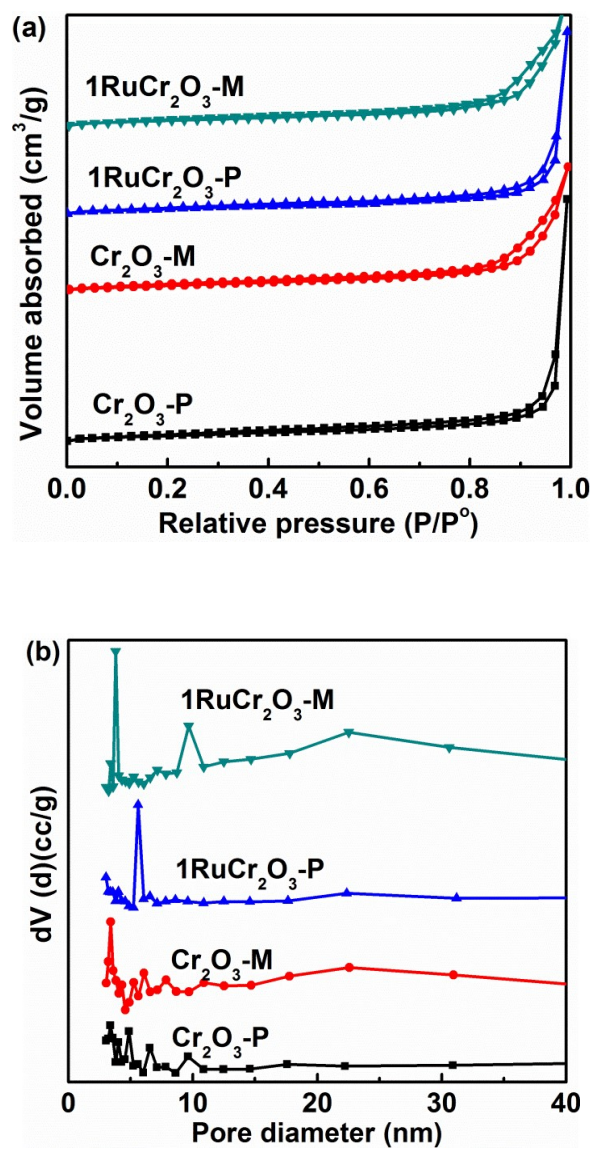

Fig. S2 Nitrogen adsorption-desorption isotherms (a) and pore-size distributions (b) of samples.

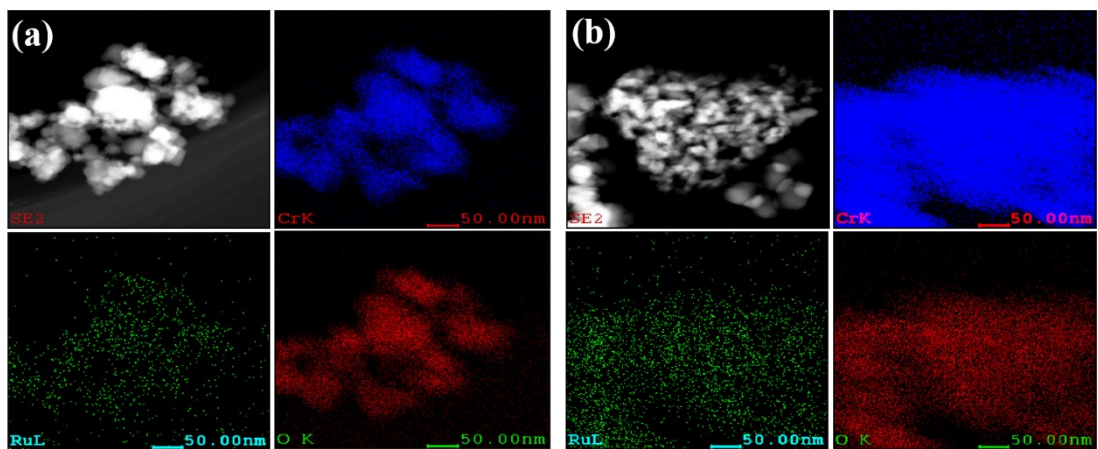

Fig. S3 Elements mapping images of 1RuCr<sub>2</sub>O<sub>3</sub>-P (a) and 1RuCr<sub>2</sub>O<sub>3</sub>-M (b).

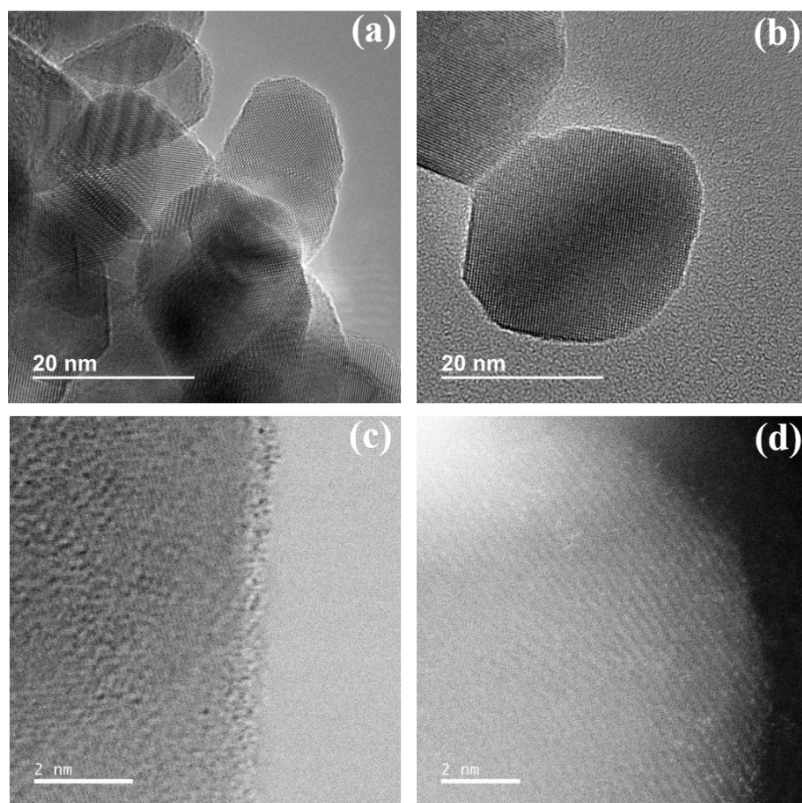

**Fig. S4** HRTEM and Cs-corrected STEM images of  $1\text{RuCr}_2\text{O}_3\text{-M}$  after being used in dry and humid conditions: (a and c, HRTEM and Cs-corrected STEM image of used  $1\text{RuCr}_2\text{O}_3\text{-M}$  in dry condition); (b and d, HRTEM and Cs-corrected STEM image of used  $1\text{RuCr}_2\text{O}_3\text{-M}$  in humid condition).
